# Supplementary material for: Type 2 Diabetes Risk Allele Loci in the Qatari Population
Source: PubMed Central journal article supplement (PMC4934876; doi:10.1371/journal.pone.0156834), 2016-07-06
Supplement: pone.0156834.s001.pdf [file pone.0156834.s001.pdf]

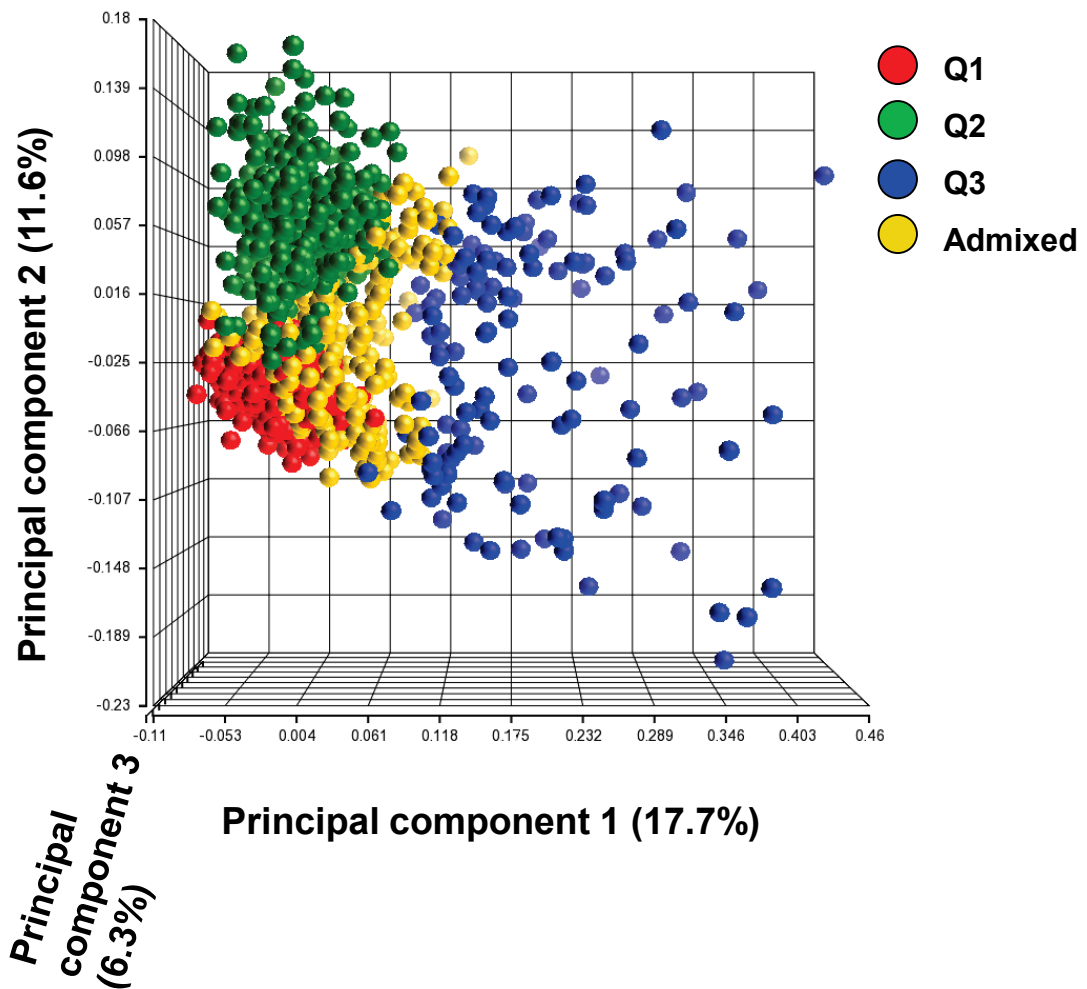

**S1 Fig.** Scatter plot of multidimensional scaling (MDS) illustrating subject distribution by Qatari genetic subpopulation. Shown is MDS on pair-wise similarities between 1,714 unrelated Qatari subjects with K=3 populations, generated using Structure v2.3. The plot illustrates Qatari genetic subpopulation structure, where a proportion of  $\geq 65\%$  was required to be assigned to Q1 (Bedouin), Q2 (Persian-South Asian), or Q3 (African) genetic subgroups;  $<65\%$  assigned to “Admixed” subgroup. Individuals are color-coded by genetic subpopulation (Q1 = red, Q2 = green, Q3 = blue, Admixed = yellow).
