# Supplementary material for: Type 2 Diabetes Risk Allele Loci in the Qatari Population
Source: PubMed Central journal article supplement (PMC4934876; doi:10.1371/journal.pone.0156834), 2016-07-06
Supplement: pone.0156834.s003.pdf [file pone.0156834.s003.pdf]

**S1 Table. Type 2 Diabetes Risk Allele SNPs**

| Category                  | Gene           | SNP                  | All Qatari           |                 |                      | Q1+Q2 <sup>1</sup>   |                 |                      | Q1 <sup>1</sup>      |                 |                      | Q2 <sup>1</sup>      |                 |                      | Q3 <sup>1</sup>      |                 |                      | Admixed <sup>1</sup> |                 |                 |
|---------------------------|----------------|----------------------|----------------------|-----------------|----------------------|----------------------|-----------------|----------------------|----------------------|-----------------|----------------------|----------------------|-----------------|----------------------|----------------------|-----------------|----------------------|----------------------|-----------------|-----------------|
|                           |                |                      | p value <sup>2</sup> | OR <sup>3</sup> | CI <sup>4</sup>      | p value <sup>2</sup> | OR <sup>3</sup> | CI <sup>4</sup>      | p value <sup>2</sup> | OR <sup>3</sup> | CI <sup>4</sup>      | p value <sup>2</sup> | OR <sup>3</sup> | CI <sup>4</sup>      | p value <sup>2</sup> | OR <sup>3</sup> | CI <sup>4</sup>      | p value <sup>2</sup> | OR <sup>3</sup> | CI <sup>4</sup> |
| Beta-cell dysfunction     | CAMK1D/CDC123  | rs12779790           | 5.0x10 <sup>-1</sup> | 1.13            | 0.909-1.401          | 2.5x10 <sup>-1</sup> | 1.26            | 0.992-1.603          | 5.5x10 <sup>-1</sup> | 1.33            | 0.972-1.812          | 8.0x10 <sup>-1</sup> | 1.16            | 0.792-1.685          | 9.7x10 <sup>-1</sup> | 0.45            | 0.174-1.176          | 9.5x10 <sup>-1</sup> | 0.85            | 0.442-1.631     |
|                           | CDKAL1         | rs10946398           | 4.3x10 <sup>-1</sup> | 1.13            | 0.931-1.364          | 5.5x10 <sup>-1</sup> | 1.12            | 0.905-1.394          | 9.9x10 <sup>-1</sup> | 1.01            | 0.764-1.340          | 4.8x10 <sup>-1</sup> | 1.32            | 0.935-1.859          | 9.7x10 <sup>-1</sup> | 1.50            | 0.713-3.158          | 9.5x10 <sup>-1</sup> | 1.23            | 0.704-2.158     |
|                           |                | rs7756992            | 8.0x10 <sup>-1</sup> | 1.06            | 0.840-1.327          | 5.8x10 <sup>-1</sup> | 1.13            | 0.856-1.469          | 9.9x10 <sup>-1</sup> | 1.01            | 0.718-1.420          | 4.8x10 <sup>-1</sup> | 1.45            | 0.919-2.278          | 9.7x10 <sup>-1</sup> | 1.14            | 0.485-2.672          | 9.5x10 <sup>-1</sup> | 0.71            | 0.355-1.411     |
|                           | CDKN2A-B       | rs545226             | 1.8x10 <sup>-1</sup> | 0.84            | 0.709-0.989          | 1.8x10 <sup>-1</sup> | 0.79            | 0.657-0.949          | 2.6x10 <sup>-1</sup> | 0.69            | 0.535-0.889          | 8.8x10 <sup>-1</sup> | 0.93            | 0.708-1.216          | 9.7x10 <sup>-1</sup> | 1.40            | 0.632-3.093          | 9.5x10 <sup>-1</sup> | 0.79            | 0.481-1.284     |
|                           |                | rs564398             | 7.6x10 <sup>-1</sup> | 0.94            | 0.772-1.134          | 1.8x10 <sup>-1</sup> | 0.90            | 0.727-1.107          | 6.4x10 <sup>-1</sup> | 0.87            | 0.651-1.151          | 9.1x10 <sup>-1</sup> | 0.94            | 0.689-1.293          | 9.7x10 <sup>-1</sup> | 1.33            | 0.418-4.224          | 9.5x10 <sup>-1</sup> | 1.08            | 0.599-1.961     |
|                           |                | rs12376000           | 1.4x10 <sup>-1</sup> | 0.64            | 0.445-0.923          | 1.8x10 <sup>-1</sup> | 0.56            | 0.375-0.842          | 5.0x10 <sup>-1</sup> | 0.57            | 0.343-0.942          | 4.8x10 <sup>-1</sup> | 0.54            | 0.271-1.074          | 9.7x10 <sup>-1</sup> | 1.62            | 0.118-22.240         | 9.5x10 <sup>-1</sup> | 1.09            | 0.394-3.001     |
|                           |                | rs944801             | 5.7x10 <sup>-1</sup> | 0.91            | 0.746-1.105          | 4.8x10 <sup>-1</sup> | 0.88            | 0.709-1.091          | 5.5x10 <sup>-1</sup> | 0.83            | 0.619-1.113          | 9.1x10 <sup>-1</sup> | 0.94            | 0.686-1.304          | 9.7x10 <sup>-1</sup> | 0.96            | 0.305-3.008          | 9.5x10 <sup>-1</sup> | 1.02            | 0.564-1.858     |
|                           |                | rs10757269           | 1.5x10 <sup>-1</sup> | 0.81            | 0.670-0.968          | 1.8x10 <sup>-1</sup> | 0.80            | 0.651-0.976          | 5.5x10 <sup>-1</sup> | 0.81            | 0.615-1.079          | 4.8x10 <sup>-1</sup> | 0.78            | 0.583-1.049          | 9.7x10 <sup>-1</sup> | 0.56            | 0.220-1.404          | 9.5x10 <sup>-1</sup> | 1.04            | 0.595-1.811     |
|                           |                | rs7341786            | 1.9x10 <sup>-1</sup> | 0.84            | 0.697-1.006          | 2.8x10 <sup>-1</sup> | 0.84            | 0.686-1.025          | 5.5x10 <sup>-1</sup> | 0.82            | 0.624-1.073          | 7.8x10 <sup>-1</sup> | 0.87            | 0.647-1.175          | 9.7x10 <sup>-1</sup> | 0.91            | 0.336-2.480          | 9.5x10 <sup>-1</sup> | 0.82            | 0.468-1.447     |
|                           | rs10811661     | 1.9x10 <sup>-1</sup> | 0.81                 | 0.651-1.002     | 3.3x10 <sup>-1</sup> | 0.82                 | 0.645-1.039     | 5.5x10 <sup>-1</sup> | 0.82                 | 0.595-1.125     | 7.8x10 <sup>-1</sup> | 0.82                 | 0.567-1.176     | 7.4x10 <sup>-1</sup> | 0.18                 | 0.049-0.683     | 9.5x10 <sup>-1</sup> | 0.98                 | 0.531-1.804     |                 |
|                           | rs10757284     | 7.9x10 <sup>-1</sup> | 1.04                 | 0.880-1.238     | 5.6x10 <sup>-1</sup> | 1.10                 | 0.908-1.339     | 5.5x10 <sup>-1</sup> | 1.18                 | 0.906-1.537     | 9.7x10 <sup>-1</sup> | 1.01                 | 0.755-1.345     | 1.0x10 <sup>0</sup>  | 1.00                 | 0.528-1.893     | 9.5x10 <sup>-1</sup> | 0.83                 | 0.499-1.381     |                 |
|                           | G6PC2          | rs560887             | 9.7x10 <sup>-1</sup> | 1.01            | 0.753-1.305          | 6.7x10 <sup>-1</sup> | 0.90            | 0.819-1.515          | 8.4x10 <sup>-1</sup> | 0.89            | 0.767-1.640          | 9.1x10 <sup>-1</sup> | 1.11            | 0.510-1.596          | 9.7x10 <sup>-1</sup> | 0.79            | 0.358-4.474          | 9.5x10 <sup>-1</sup> | 1.67            | 0.246-1.440     |
|                           | HHEX/IDE/KIF11 | rs1111875            | 1.8x10 <sup>-1</sup> | 0.82            | 0.685-0.979          | 1.8x10 <sup>-1</sup> | 0.79            | 0.649-0.968          | 9.0x10 <sup>-1</sup> | 0.94            | 0.719-1.232          | 2.1x10 <sup>-1</sup> | 0.63            | 0.465-0.859          | 9.7x10 <sup>-1</sup> | 1.29            | 0.614-2.725          | 9.5x10 <sup>-1</sup> | 0.75            | 0.443-1.269     |
|                           | HNF1A          | rs7957197            | 2.7x10 <sup>-1</sup> | 0.80            | 0.611-1.058          | 4.0x10 <sup>-1</sup> | 0.81            | 0.589-1.101          | 6.9x10 <sup>-1</sup> | 0.83            | 0.550-1.240          | 8.6x10 <sup>-1</sup> | 0.85            | 0.505-1.427          | 9.7x10 <sup>-1</sup> | 1.72            | 0.488-6.040          | 9.5x10 <sup>-1</sup> | 0.67            | 0.294-1.516     |
|                           | HNF1B          | rs4430796            | 1.8x10 <sup>-1</sup> | 0.80            | 0.649-0.991          | 1.8x10 <sup>-1</sup> | 0.75            | 0.595-0.953          | 5.0x10 <sup>-1</sup> | 0.71            | 0.521-0.962          | 7.8x10 <sup>-1</sup> | 0.83            | 0.567-1.223          | 9.7x10 <sup>-1</sup> | 1.21            | 0.422-3.445          | 9.5x10 <sup>-1</sup> | 0.84            | 0.430-1.639     |
|                           | JAZF1          | rs864745             | 1.4x10 <sup>-1</sup> | 0.81            | 0.686-0.957          | 2.4x10 <sup>-1</sup> | 0.83            | 0.691-0.999          | 9.6x10 <sup>-1</sup> | 0.96            | 0.755-1.230          | 2.1x10 <sup>-1</sup> | 0.68            | 0.514-0.909          | 9.7x10 <sup>-1</sup> | 0.69            | 0.308-1.546          | 9.5x10 <sup>-1</sup> | 0.92            | 0.560-1.508     |
|                           | KCNJ11         | rs5215               | 8.1x10 <sup>-1</sup> | 1.04            | 0.853-1.258          | 7.5x10 <sup>-1</sup> | 1.04            | 0.841-1.293          | 9.0x10 <sup>-1</sup> | 1.07            | 0.794-1.447          | 9.4x10 <sup>-1</sup> | 1.04            | 0.762-1.431          | 9.7x10 <sup>-1</sup> | 0.60            | 0.173-2.061          | 9.5x10 <sup>-1</sup> | 1.05            | 0.615-1.779     |
|                           | MADD           | rs7944584            | 8.0x10 <sup>-1</sup> | 0.94            | 0.723-1.224          | 7.5x10 <sup>-1</sup> | 1.06            | 0.792-1.421          | 5.5x10 <sup>-1</sup> | 1.37            | 0.934-2.008          | 7.8x10 <sup>-1</sup> | 0.75            | 0.463-1.223          | 9.7x10 <sup>-1</sup> | 0.23            | 0.045-1.220          | 5.9x10 <sup>-1</sup> | 0.52            | 0.249-1.089     |
| NOTCH2                    | rs10923931     | 7.9x10 <sup>-1</sup> | 1.08                 | 0.825-1.399     | 5.8x10 <sup>-1</sup> | 1.16                 | 0.846-1.597     | 9.9x10 <sup>-1</sup> | 1.01                 | 0.646-1.563     | 6.9x10 <sup>-1</sup> | 1.35                 | 0.847-2.143     | 9.7x10 <sup>-1</sup> | 0.96                 | 0.453-2.050     | 9.5x10 <sup>-1</sup> | 1.06                 | 0.506-2.222     |                 |
| THADA                     | rs7578597      | 7.6x10 <sup>-1</sup> | 0.90                 | 0.667-1.207     | 5.6x10 <sup>-1</sup> | 0.83                 | 0.570-1.197     | 9.0x10 <sup>-1</sup> | 0.87                 | 0.465-1.620     | 8.0x10 <sup>-1</sup> | 0.84                 | 0.527-1.325     | 9.7x10 <sup>-1</sup> | 1.50                 | 0.693-3.244     | 9.5x10 <sup>-1</sup> | 0.95                 | 0.462-1.952     |                 |
| Reduced insulin secretion | ADRA2A         | rs10885122           | 2.4x10 <sup>-1</sup> | 0.82            | 0.642-1.036          | 4.0x10 <sup>-1</sup> | 0.82            | 0.620-1.089          | 5.5x10 <sup>-1</sup> | 0.73            | 0.514-1.042          | 1.0x10 <sup>0</sup>  | 1.00            | 0.609-1.640          | 9.7x10 <sup>-1</sup> | 0.96            | 0.415-2.232          | 9.5x10 <sup>-1</sup> | 0.68            | 0.345-1.327     |
|                           | FADS1          | rs174550             | 1.9x10 <sup>-1</sup> | 1.26            | 0.998-1.585          | 1.8x10 <sup>-1</sup> | 1.33            | 1.026-1.710          | 5.5x10 <sup>-1</sup> | 1.28            | 0.935-1.757          | 4.8x10 <sup>-1</sup> | 1.44            | 0.918-2.262          | 9.7x10 <sup>-1</sup> | 0.94            | 0.214-4.097          | 9.5x10 <sup>-1</sup> | 1.11            | 0.558-2.220     |
|                           | GCK            | rs1799884            | 9.4x10 <sup>-1</sup> | 1.02            | 0.802-1.287          | 7.1x10 <sup>-1</sup> | 0.93            | 0.715-1.214          | 9.6x10 <sup>-1</sup> | 1.04            | 0.742-1.444          | 6.9x10 <sup>-1</sup> | 0.74            | 0.461-1.182          | 9.7x10 <sup>-1</sup> | 1.06            | 0.358-3.150          | 9.5x10 <sup>-1</sup> | 1.35            | 0.642-2.840     |
|                           |                | rs4607517            | 9.8x10 <sup>-1</sup> | 1.00            | 0.786-1.265          | 6.4x10 <sup>-1</sup> | 0.91            | 0.695-1.179          | 9.9x10 <sup>-1</sup> | 1.00            | 0.720-1.395          | 6.8x10 <sup>-1</sup> | 0.72            | 0.450-1.151          | 9.7x10 <sup>-1</sup> | 1.61            | 0.434-5.992          | 9.5x10 <sup>-1</sup> | 1.32            | 0.616-2.808     |
|                           | GLIS3          | rs7034200            | 2.7x10 <sup>-1</sup> | 0.83            | 0.668-1.042          | 5.8x10 <sup>-1</sup> | 0.89            | 0.689-1.141          | 5.5x10 <sup>-1</sup> | 0.81            | 0.585-1.116          | 9.0x10 <sup>-1</sup> | 1.11            | 0.726-1.697          | 9.7x10 <sup>-1</sup> | 0.59            | 0.209-1.691          | 6.3x10 <sup>-1</sup> | 0.58            | 0.303-1.107     |

**S1 Table. Type 2 Diabetes Risk Allele SNPs (cont., page 2)**

| Category               | Gene           | SNP                  | All Qatari           |                            |                      | Q1 + Q2 <sup>1</sup> |                      |                      | Q1 <sup>1</sup>      |                      |                      | Q2 <sup>1</sup>      |                      |                      | Q3 <sup>1</sup>      |                      |                      | Admixed <sup>1</sup> |                            |                 |             |
|------------------------|----------------|----------------------|----------------------|----------------------------|----------------------|----------------------|----------------------|----------------------|----------------------|----------------------|----------------------|----------------------|----------------------|----------------------|----------------------|----------------------|----------------------|----------------------|----------------------------|-----------------|-------------|
|                        |                |                      | p value <sup>2</sup> | OR <sup>3</sup>            | CI <sup>4</sup>      | p value <sup>2</sup> | OR <sup>3</sup>      | CI <sup>4</sup>      | p value <sup>2</sup> | OR <sup>3</sup>      | CI <sup>4</sup>      | p value <sup>2</sup> | OR <sup>3</sup>      | CI <sup>4</sup>      | p value <sup>2</sup> | OR <sup>3</sup>      | CI <sup>4</sup>      | p value <sup>2</sup> | OR <sup>3</sup>            | CI <sup>4</sup> |             |
|                        | LGR5/TSPAN8    | rs7961581            | 6.5x10 <sup>-1</sup> | 1.07                       | 0.913-1.258          | 5.8x10 <sup>-1</sup> | 1.09                 | 0.909-1.296          | 5.5x10 <sup>-1</sup> | 1.19                 | 0.943-1.507          | 9.7x10 <sup>-1</sup> | 0.97                 | 0.740-1.283          | 9.7x10 <sup>-1</sup> | 1.33                 | 0.614-2.876          | 9.5x10 <sup>-1</sup> | 1.02                       | 0.633-1.632     |             |
|                        | PROX1          | rs340874             | 8.1x10 <sup>-1</sup> | 1.04                       | 0.843-1.281          | 5.8x10 <sup>-1</sup> | 1.11                 | 0.877-1.414          | 5.5x10 <sup>-1</sup> | 1.23                 | 0.901-1.669          | 9.0x10 <sup>-1</sup> | 1.11                 | 0.736-1.665          | 9.7x10 <sup>-1</sup> | 0.71                 | 0.233-2.164          | 9.5x10 <sup>-1</sup> | 0.82                       | 0.470-1.416     |             |
|                        | SLC2A2 (GLUT2) | rs11920090           | 3.3x10 <sup>-1</sup> | 1.24                       | 0.922-1.657          | 3.5x10 <sup>-1</sup> | 1.31                 | 0.933-1.829          | 5.5x10 <sup>-1</sup> | 1.40                 | 0.909-2.165          | 9.1x10 <sup>-1</sup> | 1.11                 | 0.651-1.891          | 9.7x10 <sup>-1</sup> | 2.41                 | 0.719-8.059          | 9.3x10 <sup>-1</sup> | 0.54                       | 0.220-1.348     |             |
|                        | SLC30A8        | rs7815190            | 5.1x10 <sup>-1</sup> | 1.12                       | 0.908-1.386          | 5.9x10 <sup>-1</sup> | 1.11                 | 0.868-1.419          | 7.6x10 <sup>-1</sup> | 1.14                 | 0.823-1.571          | 9.4x10 <sup>-1</sup> | 1.05                 | 0.716-1.553          | 9.7x10 <sup>-1</sup> | 1.59                 | 0.707-3.569          | 9.5x10 <sup>-1</sup> | 1.22                       | 0.678-2.191     |             |
|                        |                | rs4876703            | 1.9x10 <sup>-1</sup> | 0.83                       | 0.695-1.000          | 2.2x10 <sup>-1</sup> | 0.80                 | 0.651-0.989          | 5.5x10 <sup>-1</sup> | 0.82                 | 0.615-1.093          | 4.8x10 <sup>-1</sup> | 0.77                 | 0.564-1.044          | 9.7x10 <sup>-1</sup> | 1.06                 | 0.527-2.112          | 9.5x10 <sup>-1</sup> | 0.98                       | 0.602-1.600     |             |
|                        |                | rs13281296           | 6.5x10 <sup>-1</sup> | 0.91                       | 0.736-1.129          | 5.8x10 <sup>-1</sup> | 0.89                 | 0.697-1.142          | 5.5x10 <sup>-1</sup> | 0.83                 | 0.629-1.104          | 8.0x10 <sup>-1</sup> | 0.85                 | 0.589-1.234          | 9.7x10 <sup>-1</sup> | 0.57                 | 0.262-1.226          | 9.5x10 <sup>-1</sup> | 1.29                       | 0.762-2.193     |             |
|                        |                | rs2466296            | 7.9x10 <sup>-1</sup> | 1.06                       | 0.891-1.254          | 9.9x10 <sup>-1</sup> | 1.00                 | 0.821-1.211          | 9.6x10 <sup>-1</sup> | 0.97                 | 0.752-1.257          | 9.7x10 <sup>-1</sup> | 1.03                 | 0.760-1.382          | 9.7x10 <sup>-1</sup> | 0.54                 | 0.274-1.076          | 9.5x10 <sup>-1</sup> | 1.04                       | 0.649-1.679     |             |
|                        |                | rs13266634           | 9.6x10 <sup>-1</sup> | 1.02                       | 0.738-1.396          | 6.9x10 <sup>-1</sup> | 1.11                 | 0.769-1.614          | 9.6x10 <sup>-1</sup> | 1.07                 | 0.590-1.942          | 8.1x10 <sup>-1</sup> | 1.20                 | 0.737-1.936          | 9.7x10 <sup>-1</sup> | 0.21                 | 0.044-1.005          | 9.5x10 <sup>-1</sup> | 1.06                       | 0.488-2.298     |             |
|                        |                | rs11558471           | 2.7x10 <sup>-1</sup> | 0.78                       | 0.581-1.058          | 6.8x10 <sup>-1</sup> | 0.89                 | 0.637-1.252          | 9.9x10 <sup>-1</sup> | 1.02                 | 0.643-1.632          | 8.0x10 <sup>-1</sup> | 0.80                 | 0.470-1.367          | 9.7x10 <sup>-1</sup> | 0.50                 | 0.133-1.902          | 5.9x10 <sup>-1</sup> | 0.43                       | 0.171-1.096     |             |
|                        |                | rs1578978            | 2.4x10 <sup>-1</sup> | 1.16                       | 0.978-1.368          | 3.3x10 <sup>-1</sup> | 1.17                 | 0.968-1.412          | 5.5x10 <sup>-1</sup> | 1.17                 | 0.907-1.507          | 7.8x10 <sup>-1</sup> | 1.15                 | 0.871-1.536          | 9.7x10 <sup>-1</sup> | 0.69                 | 0.308-1.530          | 8.4x10 <sup>-1</sup> | 1.41                       | 0.876-2.266     |             |
|                        |                | TCF7L2               | rs6585194            | 7.9x10 <sup>-1</sup>       | 0.95                 | 0.786-1.142          | 6.0x10 <sup>-1</sup> | 0.92                 | 0.739-1.136          | 8.6x10 <sup>-1</sup> | 0.92                 | 0.684-1.236          | 8.6x10 <sup>-1</sup> | 0.90                 | 0.659-1.246          | 9.7x10 <sup>-1</sup> | 0.64                 | 0.313-1.314          | 9.5x10 <sup>-1</sup>       | 1.18            | 0.708-1.962 |
|                        |                |                      | rs7901275            | 1.4x10 <sup>-1</sup>       | 0.80                 | 0.677-0.953          | 2.5x10 <sup>-1</sup> | 0.84                 | 0.691-1.013          | 5.5x10 <sup>-1</sup> | 0.81                 | 0.626-1.053          | 7.8x10 <sup>-1</sup> | 0.85                 | 0.641-1.138          | 9.7x10 <sup>-1</sup> | 0.95                 | 0.481-1.894          | 8.4x10 <sup>-1</sup>       | 0.69            | 0.409-1.149 |
|                        |                |                      | rs6585196            | 1.1x10 <sup>-1</sup>       | 0.78                 | 0.650-0.926          | 1.8x10 <sup>-1</sup> | 0.78                 | 0.642-0.953          | 5.5x10 <sup>-1</sup> | 0.85                 | 0.654-1.108          | 2.7x10 <sup>-1</sup> | 0.69                 | 0.510-0.933          | 9.7x10 <sup>-1</sup> | 0.70                 | 0.348-1.409          | 9.5x10 <sup>-1</sup>       | 0.76            | 0.440-1.302 |
|                        |                |                      | rs4074718            | 2.4x10 <sup>-1</sup>       | 0.86                 | 0.734-1.019          | 6.9x10 <sup>-1</sup> | 0.95                 | 0.786-1.137          | 9.6x10 <sup>-1</sup> | 1.03                 | 0.808-1.316          | 8.7x10 <sup>-1</sup> | 0.92                 | 0.693-1.225          | 9.7x10 <sup>-1</sup> | 1.08                 | 0.541-2.166          | <b>4.3x10<sup>-2</sup></b> | 0.43            | 0.262-0.697 |
|                        |                |                      | rs7901695            | 1.8x10 <sup>-1</sup>       | 1.20                 | 1.016-1.414          | 3.6x10 <sup>-1</sup> | 1.15                 | 0.958-1.389          | 7.6x10 <sup>-1</sup> | 1.11                 | 0.866-1.412          | 6.8x10 <sup>-1</sup> | 1.22                 | 0.908-1.620          | 9.7x10 <sup>-1</sup> | 0.95                 | 0.473-1.916          | 1.2x10 <sup>-1</sup>       | 1.90            | 1.155-3.131 |
|                        |                |                      | rs4506565            | <b>3.7x10<sup>-2</sup></b> | 1.33                 | 1.121-1.586          | 1.8x10 <sup>-1</sup> | 1.24                 | 1.023-1.507          | 5.5x10 <sup>-1</sup> | 1.18                 | 0.916-1.515          | 4.8x10 <sup>-1</sup> | 1.34                 | 0.986-1.820          | 9.7x10 <sup>-1</sup> | 1.35                 | 0.637-2.875          | <b>4.5x10<sup>-2</sup></b> | 2.43            | 1.409-4.195 |
|                        |                |                      | rs7903146            | <b>2.9x10<sup>-2</sup></b> | 1.36                 | 1.146-1.618          | 1.8x10 <sup>-1</sup> | 1.28                 | 1.057-1.551          | 5.5x10 <sup>-1</sup> | 1.20                 | 0.932-1.537          | 3.4x10 <sup>-1</sup> | 1.40                 | 1.034-1.890          | 9.7x10 <sup>-1</sup> | 1.18                 | 0.503-2.779          | 7.4x10 <sup>-2</sup>       | 2.17            | 1.291-3.649 |
|                        | rs6585198      |                      | 1.4x10 <sup>-1</sup> | 0.81                       | 0.683-0.962          | 4.0x10 <sup>-1</sup> | 1.15                 | 0.947-1.388          | 6.4x10 <sup>-1</sup> | 1.14                 | 0.886-1.460          | 7.8x10 <sup>-1</sup> | 0.87                 | 0.644-1.175          | 9.7x10 <sup>-1</sup> | 0.87                 | 0.435-1.747          | 9.3x10 <sup>-2</sup> | 0.48                       | 0.288-0.810     |             |
|                        | rs7924080      | 1.8x10 <sup>-1</sup> | 0.84                 | 0.709-0.987                | 3.8x10 <sup>-1</sup> | 0.87                 | 0.725-1.047          | 6.3x10 <sup>-1</sup> | 1.14                 | 0.893-1.451          | 7.8x10 <sup>-1</sup> | 0.87                 | 0.656-1.160          | 9.7x10 <sup>-1</sup> | 1.05                 | 0.518-2.144          | 1.2x10 <sup>-1</sup> | 0.52                 | 0.317-0.862                |                 |             |
|                        | rs7900150      | 2.4x10 <sup>-1</sup> | 0.87                 | 0.736-1.020                | 4.8x10 <sup>-1</sup> | 0.90                 | 0.746-1.074          | 7.8x10 <sup>-1</sup> | 1.09                 | 0.858-1.386          | 7.8x10 <sup>-1</sup> | 0.87                 | 0.655-1.157          | 9.7x10 <sup>-1</sup> | 1.15                 | 0.565-2.321          | 2.2x10 <sup>-1</sup> | 0.56                 | 0.344-0.929                |                 |             |
| Pancreatic development | HHEX           | rs5015480            | 1.9x10 <sup>-1</sup> | 0.86                       | 0.731-1.007          | 1.8x10 <sup>-1</sup> | 0.82                 | 0.685-0.981          | 8.0x10 <sup>-1</sup> | 0.92                 | 0.728-1.167          | 2.1x10 <sup>-1</sup> | 0.69                 | 0.521-0.915          | 9.7x10 <sup>-1</sup> | 1.07                 | 0.541-2.116          | 9.5x10 <sup>-1</sup> | 0.89                       | 0.552-1.442     |             |
|                        | IGF2BP2        | rs4402960            | 4.8x10 <sup>-1</sup> | 1.11                       | 0.933-1.312          | 2.6x10 <sup>-1</sup> | 1.20                 | 0.985-1.451          | 5.0x10 <sup>-1</sup> | 1.32                 | 1.025-1.711          | 9.4x10 <sup>-1</sup> | 1.04                 | 0.769-1.414          | 9.7x10 <sup>-1</sup> | 0.99                 | 0.482-2.030          | 9.5x10 <sup>-1</sup> | 0.83                       | 0.523-1.328     |             |
| Insulin resistance     | GCKR           | rs780094             | 1.8x10 <sup>-1</sup> | 1.25                       | 0.647-0.993          | 4.0x10 <sup>-1</sup> | 1.18                 | 0.671-1.078          | 5.5x10 <sup>-1</sup> | 1.32                 | 0.563-1.024          | 9.1x10 <sup>-1</sup> | 0.91                 | 0.725-1.655          | 9.7x10 <sup>-1</sup> | 2.22                 | 0.156-1.316          | 9.5x10 <sup>-1</sup> | 1.19                       | 0.424-1.657     |             |
|                        | KLF14          | rs972283             | 9.4x10 <sup>-1</sup> | 1.02                       | 0.808-1.278          | 6.8x10 <sup>-1</sup> | 0.92                 | 0.705-1.193          | 9.0x10 <sup>-1</sup> | 0.93                 | 0.666-1.298          | 8.6x10 <sup>-1</sup> | 0.87                 | 0.549-1.368          | 9.7x10 <sup>-1</sup> | 1.77                 | 0.629-5.005          | 9.5x10 <sup>-1</sup> | 1.26                       | 0.639-2.469     |             |
|                        | PPARG          | rs1801282            | 8.3x10 <sup>-1</sup> | 0.96                       | 0.685-1.341          | 7.3x10 <sup>-1</sup> | 0.93                 | 0.640-1.340          | 9.9x10 <sup>-1</sup> | 1.04                 | 0.604-1.774          | 7.8x10 <sup>-1</sup> | 0.78                 | 0.488-1.360          | 9.7x10 <sup>-1</sup> | 2.41                 | 0.255-22.710         | 9.5x10 <sup>-1</sup> | 0.86                       | 0.331-2.223     |             |
|                        |                | rs1373641            | 2.8x10 <sup>-1</sup> | 0.87                       | 0.730-1.039          | 2.5x10 <sup>-1</sup> | 0.82                 | 0.674-1.007          | 7.6x10 <sup>-1</sup> | 0.89                 | 0.681-1.167          | 4.8x10 <sup>-1</sup> | 0.75                 | 0.555-1.020          | 9.7x10 <sup>-1</sup> | 1.39                 | 0.611-3.141          | 9.5x10 <sup>-1</sup> | 0.97                       | 0.617-1.522     |             |
|                        | rs709149       | 1.4x10 <sup>-1</sup> | 0.81                 | 0.684-0.956                | 1.8x10 <sup>-1</sup> | 0.78                 | 0.648-0.944          | 5.5x10 <sup>-1</sup> | 0.83                 | 0.643-1.074          | 3.4x10 <sup>-1</sup> | 0.73                 | 0.553-0.972          | 9.7x10 <sup>-1</sup> | 0.91                 | 0.441-1.866          | 9.5x10 <sup>-1</sup> | 0.88                 | 0.555-1.385                |                 |             |

**S1 Table. Type 2 Diabetes Risk Allele SNPs (cont., page 3)**

| Category                    | Gene             | SNP        | All Qatari           |                 |                 | Q1+Q2 <sup>1</sup>   |                 |                 | Q1 <sup>1</sup>      |                 |                 | Q2 <sup>1</sup>      |                 |                 | Q3 <sup>1</sup>      |                 |                 | Admixed <sup>1</sup> |                 |                 |
|-----------------------------|------------------|------------|----------------------|-----------------|-----------------|----------------------|-----------------|-----------------|----------------------|-----------------|-----------------|----------------------|-----------------|-----------------|----------------------|-----------------|-----------------|----------------------|-----------------|-----------------|
|                             |                  |            | p value <sup>2</sup> | OR <sup>3</sup> | CI <sup>4</sup> | p value <sup>2</sup> | OR <sup>3</sup> | CI <sup>4</sup> | p value <sup>2</sup> | OR <sup>3</sup> | CI <sup>4</sup> | p value <sup>2</sup> | OR <sup>3</sup> | CI <sup>4</sup> | p value <sup>2</sup> | OR <sup>3</sup> | CI <sup>4</sup> | p value <sup>2</sup> | OR <sup>3</sup> | CI <sup>4</sup> |
| Possible insulin resistance | ADAMTS9          | rs4607103  | 7.9x10 <sup>-1</sup> | 1.05            | 0.892-1.243     | 5.8x10 <sup>-1</sup> | 1.08            | 0.899-1.306     | 9.0x10 <sup>-1</sup> | 1.05            | 0.827-1.344     | 7.9x10 <sup>-1</sup> | 1.14            | 0.845-1.525     | 9.7x10 <sup>-1</sup> | 1.12            | 0.601-2.100     | 9.5x10 <sup>-1</sup> | 1.09            | 0.831-2.313     |
| Obesity                     | FTO <sup>5</sup> | rs1075440  | 8.1x10 <sup>-1</sup> | 0.96            | 0.784-1.176     | 6.9x10 <sup>-1</sup> | 0.94            | 0.750-1.168     | 7.6x10 <sup>-1</sup> | 0.89            | 0.652-1.208     | 9.8x10 <sup>-1</sup> | 0.99            | 0.723-1.372     | 9.7x10 <sup>-1</sup> | 0.95            | 0.344-2.628     | 9.5x10 <sup>-1</sup> | 1.16            | 0.627-2.157     |
|                             |                  | rs13333228 | 7.9x10 <sup>-1</sup> | 0.94            | 0.740-1.196     | 9.3x10 <sup>-1</sup> | 0.99            | 0.758-1.282     | 9.7x10 <sup>-1</sup> | 1.03            | 0.717-1.489     | 9.1x10 <sup>-1</sup> | 0.93            | 0.628-1.370     | 9.7x10 <sup>-1</sup> | 0.50            | 0.136-1.864     | 9.5x10 <sup>-1</sup> | 0.79            | 0.381-1.621     |
|                             |                  | rs8047395  | 7.9x10 <sup>-1</sup> | 0.96            | 0.814-1.130     | 7.4x10 <sup>-1</sup> | 0.96            | 0.801-1.151     | 9.1x10 <sup>-1</sup> | 0.95            | 0.747-1.216     | 9.7x10 <sup>-1</sup> | 0.98            | 0.746-1.296     | 9.7x10 <sup>-1</sup> | 0.59            | 0.288-1.224     | 9.5x10 <sup>-1</sup> | 1.06            | 0.657-1.695     |
|                             |                  | rs9930333  | 8.4x10 <sup>-1</sup> | 0.98            | 0.821-1.159     | 9.1x10 <sup>-1</sup> | 0.99            | 0.812-1.196     | 9.9x10 <sup>-1</sup> | 0.99            | 0.760-1.296     | 9.7x10 <sup>-1</sup> | 1.02            | 0.760-1.358     | 9.7x10 <sup>-1</sup> | 1.11            | 0.586-2.107     | 9.5x10 <sup>-1</sup> | 1.22            | 0.743-2.015     |
|                             |                  | rs17817449 | 7.9x10 <sup>-1</sup> | 1.05            | 0.893-1.233     | 7.4x10 <sup>-1</sup> | 1.04            | 0.870-1.249     | 8.2x10 <sup>-1</sup> | 0.92            | 0.725-1.178     | 9.7x10 <sup>-1</sup> | 0.99            | 0.753-1.302     | 9.7x10 <sup>-1</sup> | 1.10            | 0.598-2.033     | 9.5x10 <sup>-1</sup> | 1.20            | 0.742-1.934     |
|                             |                  | rs8050136  | 8.1x10 <sup>-1</sup> | 1.04            | 0.881-1.218     | 7.5x10 <sup>-1</sup> | 1.04            | 0.864-1.240     | 9.2x10 <sup>-1</sup> | 0.96            | 0.751-1.219     | 9.7x10 <sup>-1</sup> | 1.02            | 0.776-1.345     | 9.7x10 <sup>-1</sup> | 1.25            | 0.649-2.390     | 9.5x10 <sup>-1</sup> | 1.11            | 0.688-1.790     |
|                             |                  | rs9939609  | 8.1x10 <sup>-1</sup> | 1.03            | 0.878-1.216     | 6.9x10 <sup>-1</sup> | 0.95            | 0.789-1.139     | 9.6x10 <sup>-1</sup> | 0.97            | 0.761-1.244     | 8.6x10 <sup>-1</sup> | 1.09            | 0.824-1.443     | 9.7x10 <sup>-1</sup> | 0.95            | 0.502-1.814     | 9.5x10 <sup>-1</sup> | 1.10            | 0.683-1.760     |
|                             |                  | rs7201850  | 7.9x10 <sup>-1</sup> | 1.08            | 0.804-1.442     | 7.4x10 <sup>-1</sup> | 0.93            | 0.662-1.302     | 7.6x10 <sup>-1</sup> | 1.21            | 0.737-1.987     | 9.7x10 <sup>-1</sup> | 1.05            | 0.637-1.715     | 9.7x10 <sup>-1</sup> | 1.05            | 0.316-3.459     | 9.5x10 <sup>-1</sup> | 1.08            | 0.448-2.613     |
|                             |                  | rs11642841 | 2.4x10 <sup>-1</sup> | 1.16            | 0.981-1.363     | 2.5x10 <sup>-1</sup> | 1.18            | 0.989-1.417     | 6.3x10 <sup>-1</sup> | 1.14            | 0.897-1.436     | 4.8x10 <sup>-1</sup> | 1.28            | 0.962-1.695     | 9.7x10 <sup>-1</sup> | 0.61            | 0.260-1.447     | 9.5x10 <sup>-1</sup> | 1.30            | 0.790-2.136     |
|                             |                  | rs11075995 | 3.5x10 <sup>-1</sup> | 1.12            | 0.950-1.328     | 4.0x10 <sup>-1</sup> | 1.14            | 0.943-1.370     | 5.8x10 <sup>-1</sup> | 1.16            | 0.901-1.480     | 8.0x10 <sup>-1</sup> | 1.12            | 0.841-1.487     | 9.7x10 <sup>-1</sup> | 1.36            | 0.610-3.039     | 9.5x10 <sup>-1</sup> | 0.97            | 0.616-1.532     |
| Circadian rhythm            | CRY2             | rs11605924 | 5.0x10 <sup>-1</sup> | 0.89            | 0.720-1.098     | 4.8x10 <sup>-1</sup> | 0.87            | 0.682-1.101     | 5.5x10 <sup>-1</sup> | 0.73            | 0.536-0.993     | 7.8x10 <sup>-1</sup> | 1.25            | 0.834-1.873     | 9.7x10 <sup>-1</sup> | 1.27            | 0.465-3.484     | 9.5x10 <sup>-1</sup> | 1.11            | 0.605-2.018     |

<sup>1</sup> Q1=Bedouin, Q2=Persian/South Asian, Q3=African, Admixed=Structure cut-off <0.65 in all sub-populations (k=3).

<sup>2</sup> Benjamini-Hochberg corrected p-value.

<sup>3</sup> Estimated odds ratio (OR).

<sup>4</sup> Lower and upper bounds of 95% confidence interval (CI) for odds ratio.

<sup>5</sup> No BMI covariate used for FTO gene.
