# Supplementary material for: Type 2 Diabetes Risk Allele Loci in the Qatari Population
Source: PubMed Central journal article supplement (PMC4934876; doi:10.1371/journal.pone.0156834), 2016-07-06
Supplement: pone.0156834.s004.pdf [file pone.0156834.s004.pdf]

**S2 Table. Statistical Power to Detect Associations with Type 2 Diabetes for Known Risk Alleles**

| Gene           | SNP        | Risk allele | Cases | Con-trols | OR <sup>1</sup> | Power | Cases for 80% power <sup>2</sup> | Power at max OR=2.71 <sup>3</sup> | Cases for 80% power at max OR=2.71 <sup>3</sup> | Mini-mum OR for 80% power <sup>4</sup> | Refer-ence |
|----------------|------------|-------------|-------|-----------|-----------------|-------|----------------------------------|-----------------------------------|-------------------------------------------------|----------------------------------------|------------|
| CAMK1D/CDC123  | rs12779790 | G           | 1067  | 554       | 1.11            | 0.27  | 4652                             | 1                                 | 71                                              | 1.24                                   | [1]        |
| CDKAL1         | rs10946398 | C           | 982   | 519       | 1.12            | 0.41  | 2605                             | 1                                 | 50                                              | 1.20                                   | [2]        |
|                | rs7756992  | G           | 624   | 326       | 1.20            | 0.61  | 970                              | 1                                 | 50                                              | 1.26                                   | [3]        |
| CDKN2A-B       | rs564398   | T           | 1108  | 576       | 1.12            | 0.35  | 3547                             | 1                                 | 89                                              | 1.23                                   | [2]        |
|                | rs10811661 | T           | 1071  | 557       | 1.20            | 0.64  | 1572                             | 1                                 | 107                                             | 1.26                                   | [4]        |
| G6PC2          | rs560887   | G           | 560   | 300       | 1.03            | 0.06  | 51441                            | 1                                 | 91                                              | 1.34                                   | [5]        |
| HHEX/IDE/KIF11 | rs1111875  | C           | 1021  | 526       | 1.19            | 0.78  | 1068                             | 1                                 | 63                                              | 1.20                                   | [6]        |
| HNF1A          | rs7957197  | T           | 546   | 296       | 1.07            | 0.10  | 10951                            | 1                                 | 95                                              | 1.35                                   | [7]        |
| HNF1B (TCF2)   | rs4430796  | G           | 620   | 325       | 1.11            | 0.26  | 2752                             | 1                                 | 54                                              | 1.25                                   | [7]        |
| JAZF1          | rs864745   | T           | 1071  | 564       | 1.10            | 0.37  | 3190                             | 1                                 | 53                                              | 1.19                                   | [1]        |
| KCNJ11         | rs5215     | C           | 1089  | 565       | 1.14            | 0.49  | 2294                             | 1                                 | 58                                              | 1.21                                   | [2]        |
| MADD           | rs7944584  | A           | 623   | 325       | 1.01            | 0.05  | 418201                           | 1                                 | 85                                              | 1.31                                   | [5]        |
| NOTCH2         | rs10923931 | T           | 1087  | 576       | 1.13            | 0.30  | 4174                             | 1                                 | 86                                              | 1.27                                   | [1]        |
| THADA          | rs7578597  | T           | 1117  | 588       | 1.15            | 0.28  | 4650                             | 1                                 | 192                                             | 1.34                                   | [1]        |
| ADRA2A         | rs10885122 | G           | 622   | 323       | 1.04            | 0.07  | 25174                            | 1                                 | 74                                              | 1.29                                   | [5]        |
| FADS1          | rs174550   | T           | 624   | 325       | 1.04            | 0.07  | 23972                            | 1                                 | 70                                              | 1.28                                   | [5]        |
| GCK            | rs1799884  | A           | 617   | 321       | 1.34            | 0.95  | 382                              | 1                                 | 52                                              | 1.27                                   | [8]        |
|                | rs4607517  | A           | 621   | 319       | 1.07            | 0.12  | 8019                             | 1                                 | 53                                              | 1.27                                   | [5]        |
| GLIS3          | rs7034200  | A           | 619   | 324       | 1.27            | 0.86  | 527                              | 1                                 | 54                                              | 1.25                                   | [9]        |
| LGR5/TSPAN8    | rs7961581  | C           | 1090  | 579       | 1.09            | 0.31  | 3931                             | 1                                 | 47                                              | 1.18                                   | [1]        |
| PROX1          | rs340874   | C           | 623   | 325       | 1.07            | 0.14  | 6524                             | 1                                 | 47                                              | 1.24                                   | [5]        |
| SLC2A2(GLUT2)  | rs11920090 | T           | 625   | 325       | 1.01            | 0.05  | 509320                           | 1                                 | 107                                             | 1.34                                   | [5]        |
| SLC30A8        | rs11558471 | A           | 621   | 323       | 2.17            | 1.00  | 120                              | 1                                 | 120                                             | 1.37                                   | [10]       |
|                | rs13266634 | C           | 437   | 332       | 1.18            | 0.31  | 1629                             | 1                                 | 95                                              | 1.39                                   | [11]       |
| TCF7L2         | rs4506565  | T           | 1033  | 547       | 1.36            | 1.00  | 297                              | 1                                 | 47                                              | 1.19                                   | [12]       |
|                | rs7901695  | C           | 1107  | 584       | 1.37            | 1.00  | 281                              | 1                                 | 47                                              | 1.18                                   | [2]        |
|                | rs7903146  | T           | 1079  | 571       | 1.54            | 1.00  | 153                              | 1                                 | 47                                              | 1.18                                   | [13]       |
| HHEX           | rs5015480  | C           | 1073  | 546       | 1.16            | 0.71  | 1320                             | 1                                 | 55                                              | 1.19                                   | [7]        |
| IGF2BP2        | rs4402960  | T           | 1075  | 533       | 1.14            | 0.59  | 1763                             | 1                                 | 49                                              | 1.19                                   | [2]        |
| GCKR           | rs780094   | C           | 619   | 322       | 1.04            | 0.09  | 15425                            | 1                                 | 57                                              | 1.26                                   | [14]       |
| KLF14          | rs972283   | G           | 518   | 295       | 1.07            | 0.12  | 6671                             | 1                                 | 53                                              | 1.27                                   | [7]        |
| PPARG          | rs1801282  | C           | 1105  | 566       | 1.14            | 0.19  | 7647                             | 1                                 | 289                                             | 1.44                                   | [4]        |
| ADAMTS9        | rs4607103  | C           | 1031  | 531       | 1.09            | 0.32  | 3692                             | 1                                 | 48                                              | 1.19                                   | [1]        |
| FTO            | rs11642841 | A           | 1098  | 567       | 1.12            | 0.49  | 2305                             | 1                                 | 47                                              | 1.18                                   | [7]        |

**S2 Table. Statistical Power to Detect Associations with Type 2 Diabetes for known Risk Alleles (cont., page 2)**

| <b>Gene</b> | <b>SNP</b> | <b>Risk allele</b> | <b>Cases</b> | <b>Con-<br/>trols</b> | <b>OR<sup>1</sup></b> | <b>Power</b> | <b>Cases for<br/>80%<br/>power<sup>2</sup></b> | <b>Power at<br/>max<br/>OR=2.71<sup>3</sup></b> | <b>Cases for<br/>80%<br/>power at<br/>max<br/>OR=2.71<sup>3</sup></b> | <b>Mini-<br/>mum<br/>OR for<br/>80%<br/>power<sup>4</sup></b> | <b>Refer-<br/>ence</b> |
|-------------|------------|--------------------|--------------|-----------------------|-----------------------|--------------|------------------------------------------------|-------------------------------------------------|-----------------------------------------------------------------------|---------------------------------------------------------------|------------------------|
|             | rs8050136  | A                  | 1109         | 567                   | 1.17                  | 0.79         | 1142                                           | 1                                               | 49                                                                    | 1.18                                                          | [2]                    |
|             | rs9939609  | A                  | 1077         | 553                   | 1.34                  | 1.00         | 329                                            | 1                                               | 49                                                                    | 1.18                                                          | [12<br>]               |
| CRY         | rs11605924 | A                  | 626          | 326                   | 1.14                  | 0.41         | 1624                                           | 1                                               | 49                                                                    | 1.24                                                          | [9]                    |

<sup>1</sup> Odds ratio.

<sup>2</sup> Based on published odds ratios (OR).

<sup>3</sup> Based on maximum odds ratios (OR) of 37 T2D associated SNPs.

<sup>4</sup> Minimum odds ratio (OR) with >80% power to detect an association given the sample size; calculated using a range of OR between 1.01 and 2.17, in 0.01 step intervals
