# Supplementary material for: Type 2 Diabetes Risk Allele Loci in the Qatari Population
Source: PubMed Central journal article supplement (PMC4934876; doi:10.1371/journal.pone.0156834), 2016-07-06
Supplement: pone.0156834.s005.pdf [file pone.0156834.s005.pdf]

**S3 Table. Demographics of Type 2 Diabetic Cases and Controls<sup>1</sup>**

| Parameters                                                           | European SNPs      |                    |                      | South Asian SNPs   |                    |                      |
|----------------------------------------------------------------------|--------------------|--------------------|----------------------|--------------------|--------------------|----------------------|
|                                                                      | Controls           | T2D cases          | p value              | Controls           | T2D cases          | p value              |
| n                                                                    | 590                | 1124               |                      | 326                | 626                |                      |
| Gender (M/F) <sup>4</sup>                                            | 213/377            | 447/677            | 1.4x10 <sup>-1</sup> | 68/258             | 201/425            | 2.5x10 <sup>-4</sup> |
| Age at examination (yr) <sup>1,5</sup>                               | 46 ± 9             | 55 ± 10            | p<10 <sup>-10</sup>  | 46 ± 9             | 55 ± 10            | p<10 <sup>-10</sup>  |
| Genetic subpopulation <sup>2,4</sup> (Q1/Q2/Q3/Admixed) <sup>3</sup> | 46.4/34.6/6.3/12.7 | 44.9/33.0/8.5/13.5 | 9.4x10 <sup>-1</sup> | 49.4/31.0/5.5/14.1 | 46.2/29.9/9.9/14.1 | 7.1x10 <sup>-1</sup> |
| BMI (kg/m <sup>2</sup> ) <sup>1,5</sup>                              | 32 ± 7             | 34 ± 7             | 1.4x10 <sup>-6</sup> | 32 ± 8             | 34 ± 7             | 8.3x10 <sup>-4</sup> |
| HbA1c (%) <sup>1,5,6</sup>                                           | 5.6 ± 0.4          | 8.3 ± 1.9          | p<10 <sup>-10</sup>  | 5.6 ± 0.4          | 8.4 ± 2.0          | p<10 <sup>-10</sup>  |
| Creatinine (μmol/L) <sup>1,5</sup>                                   | 72.6 ± 29.7        | 81.5 ± 71.5        | 1.5x10 <sup>-3</sup> | 70.1 ± 34.1        | 79.4 ± 73.4        | 5.6x10 <sup>-2</sup> |
| Glucose (mmol/L) <sup>1,5</sup>                                      | 5.2 ± 0.8          | 9.5 ± 4.6          | p<10 <sup>-10</sup>  | 5.1 ± 0.7          | 9.4 ± 4.9          | p<10 <sup>-10</sup>  |

<sup>1</sup> Data are presented as mean ± standard deviation.

<sup>2</sup> Data are presented as percent of total n.

<sup>3</sup> Q1=Bedouin, Q2=Persian/South Asian, Q3=African, Admixed=Structure cut-off <0.65 in all sub-populations (k=3).

<sup>4</sup> Chi-square p value.

<sup>5</sup> Student's t-test two-tailed distribution with unequal variance p value.

<sup>6</sup> HbA1C level available for 336 control subjects.

<sup>7</sup> Glucose level available for 284 control subjects.
